# Supplementary material
Source: Springer Nature journal article supplement (https://www.springermedizin.de/resource/supplementary/13058_2012_3185_MOESM9_ESM.pdf/9703458)

A

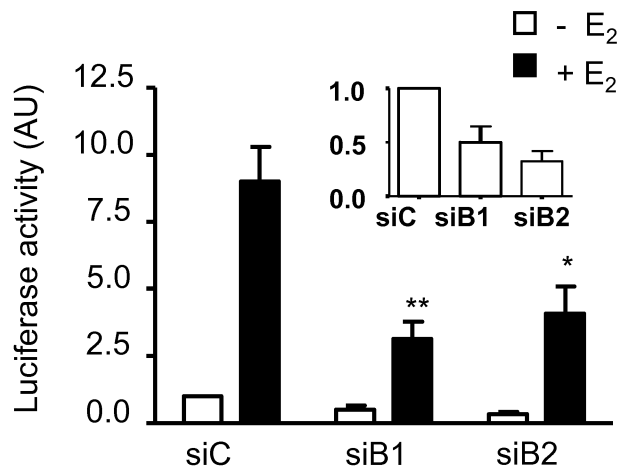

B

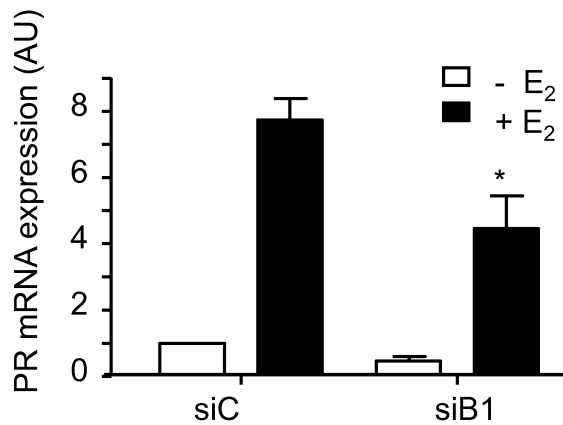

C

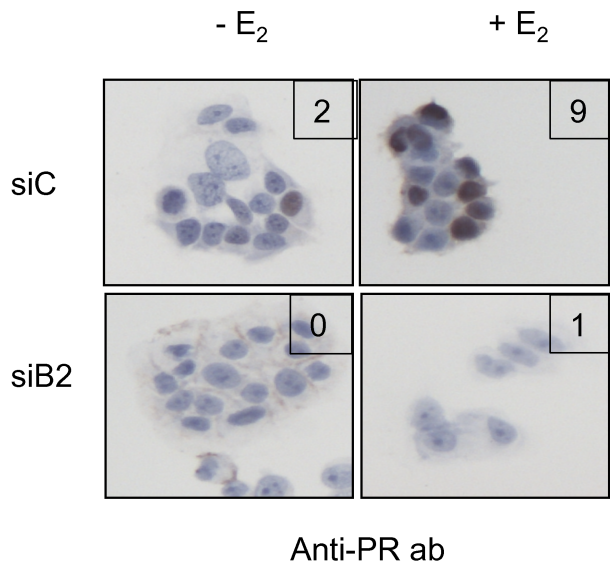

D

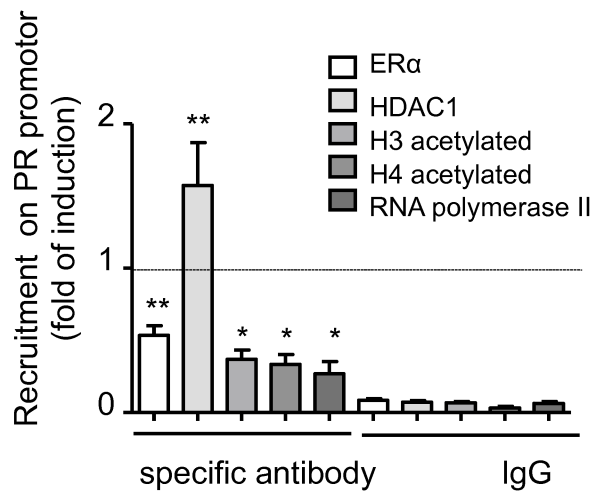

Supplement: MOESM9 [file 9703458]
